# Supplementary material for: Convergent coexpression of autism associated genes suggests some novel risk genes may not be detectable in large-scale genetic studies
Source: bioRxiv or medRxiv preprint supplement (doi:10.1101/2022.02.28.22271620), 2022-08-11
Supplement: Supplementary file [file media-1.pdf]

## Supplementary Figures

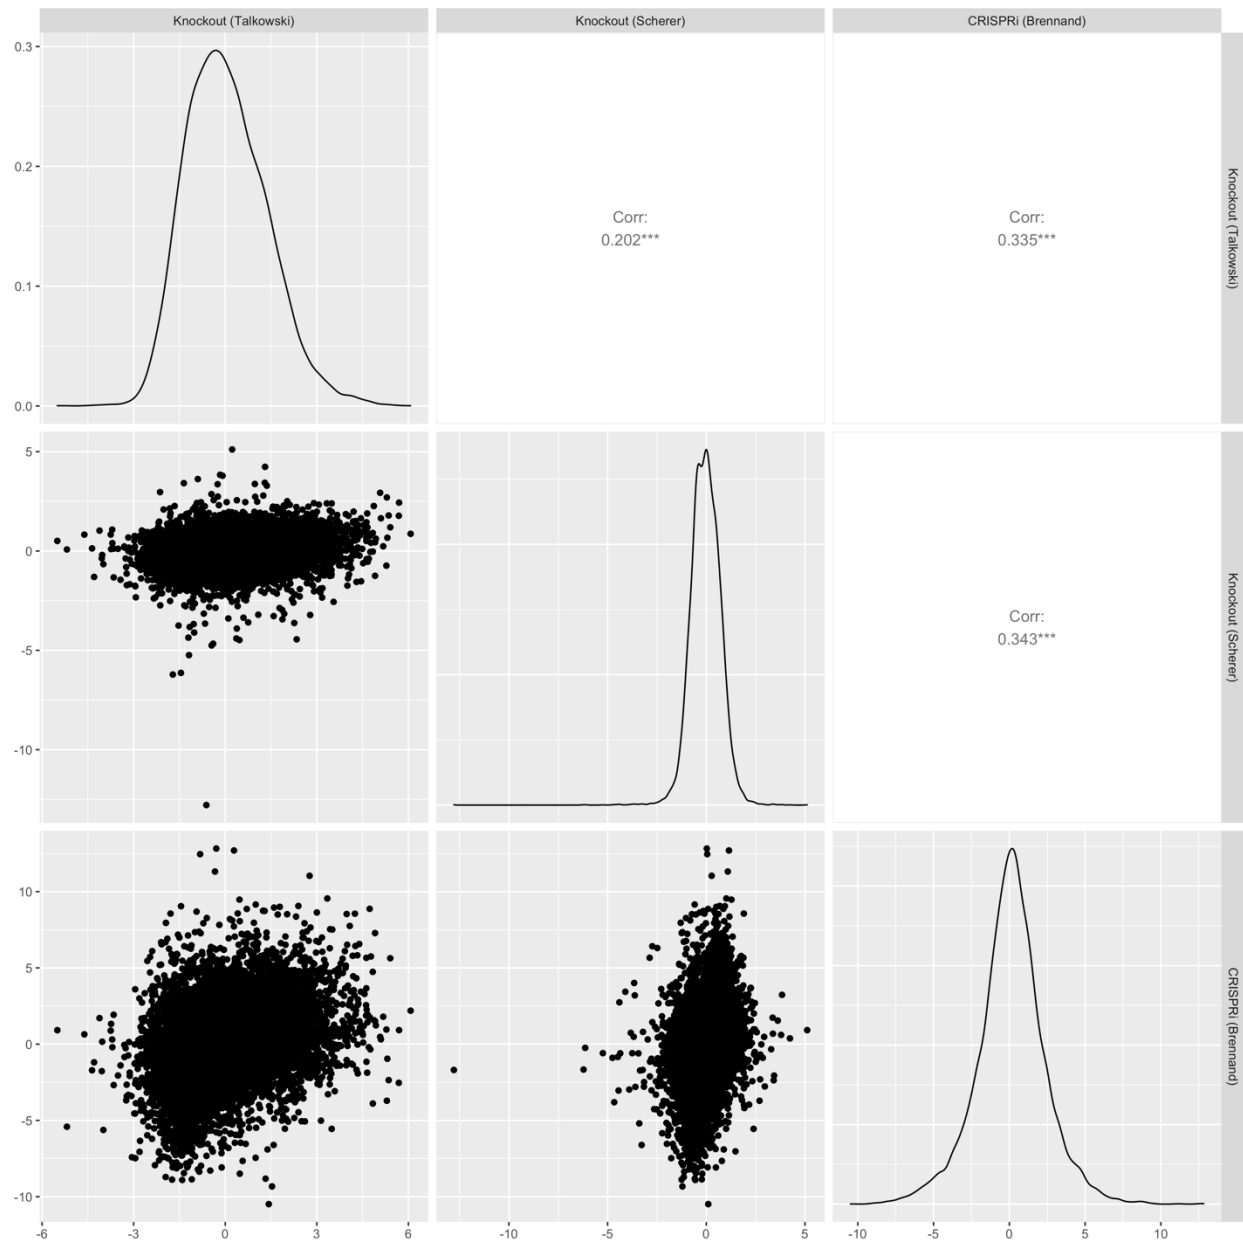

**Supplementary Figure 1. Correlation of differential expression between different *SCN2A* experiments. Differential expression represented with Z-scores.**

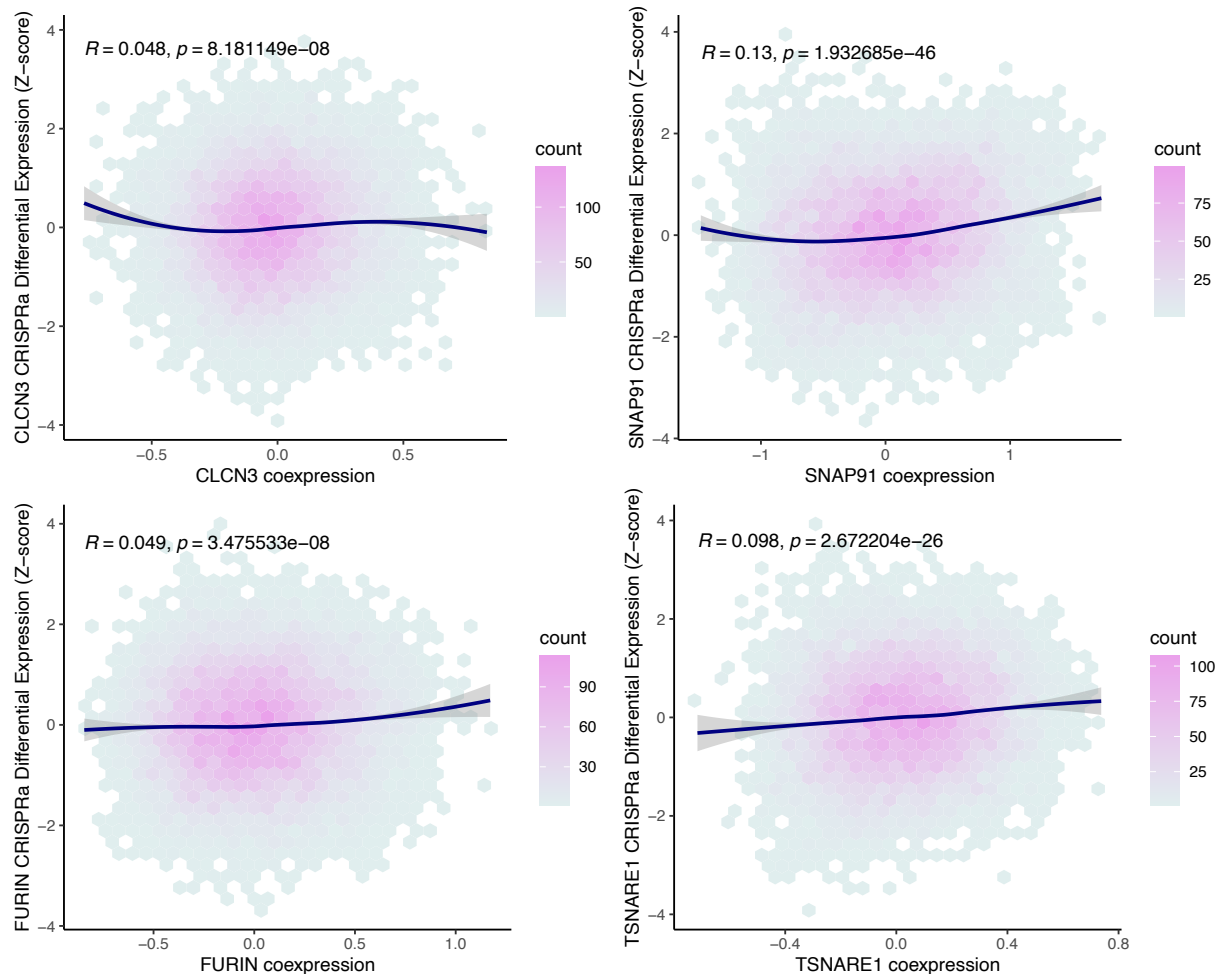

**Supplementary Figure 2. Coexpression positively correlates with differential expression for CRISPR activation.** Coexpression represented as a Fisher transformed Pearson's correlation Z-score. A Pearson correlation was done to assess the correlation between coexpression and differential expression. The curve for each panel was fitted with a locally weighted smoothing (LOESS) regression.

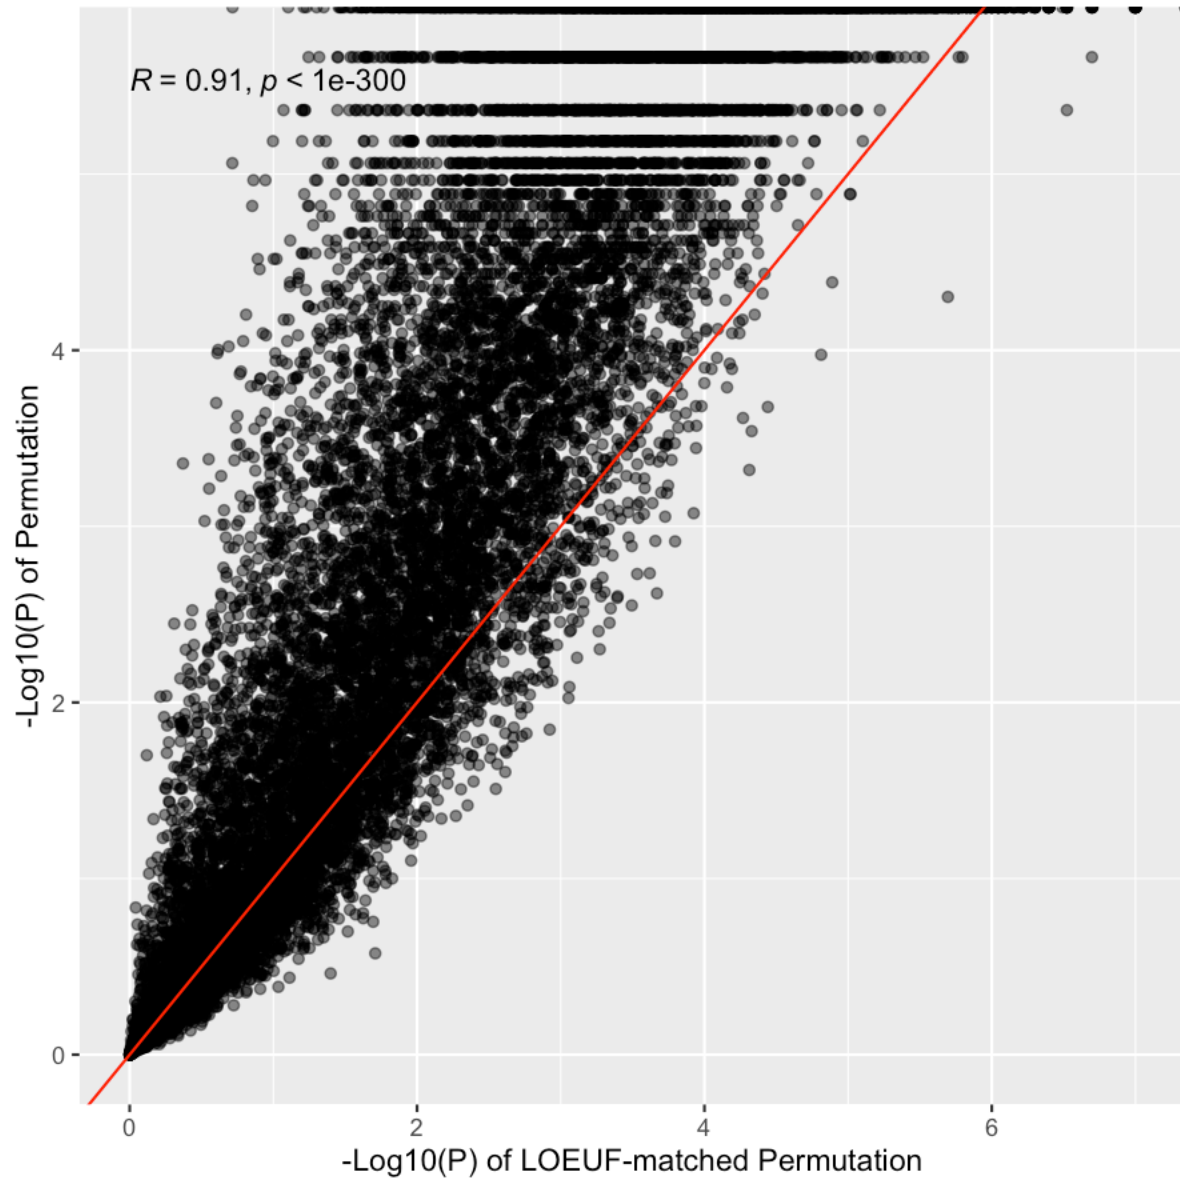

**Supplementary Figure 3. LOEUF-adjusted permutation has similar ranks of genes to unadjusted.** Correlation was done using Spearman's rank correlation.

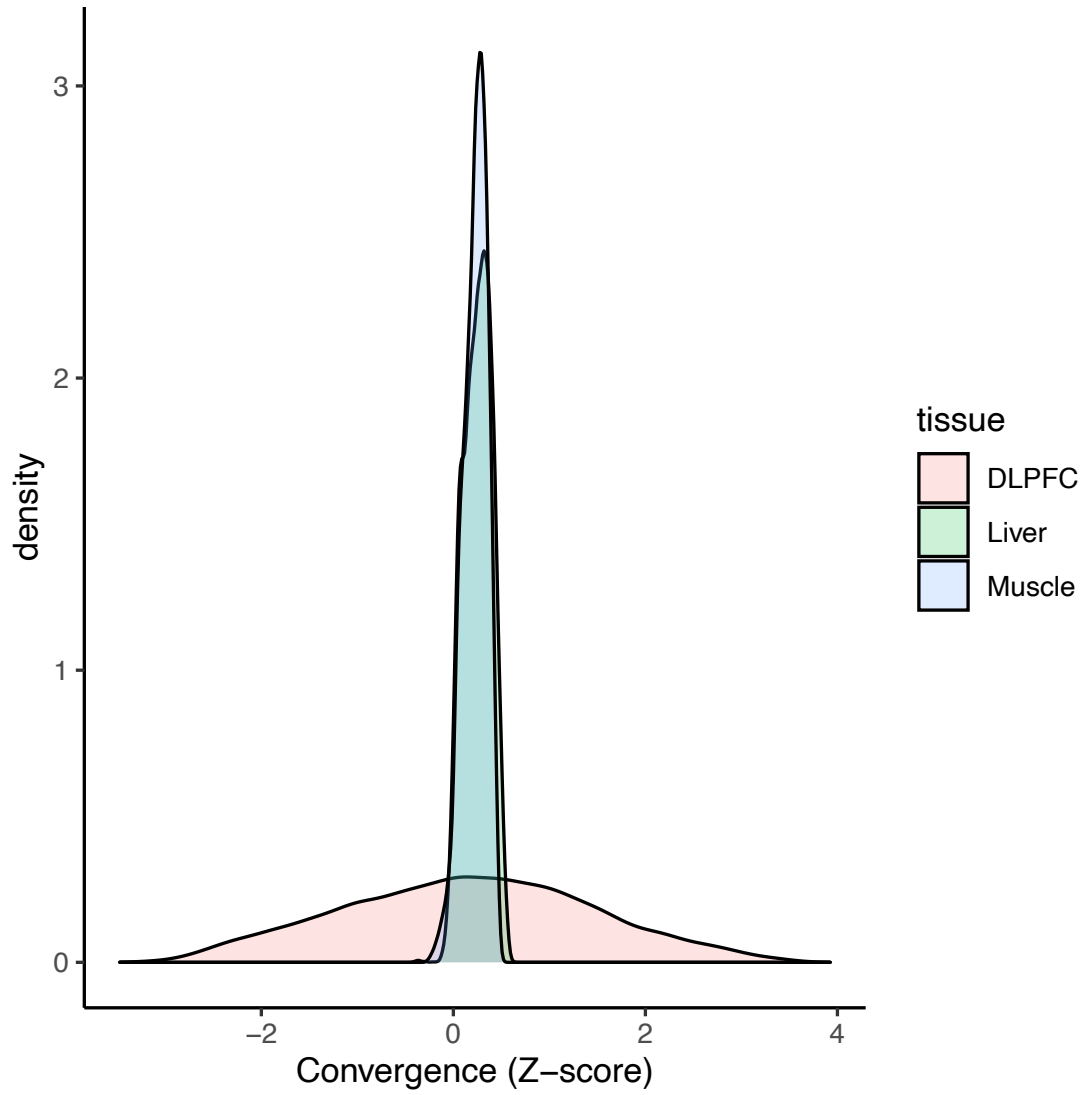

**Supplementary Figure 4. Transcriptional convergence of high confidence ASD genes are specific to the brain.**

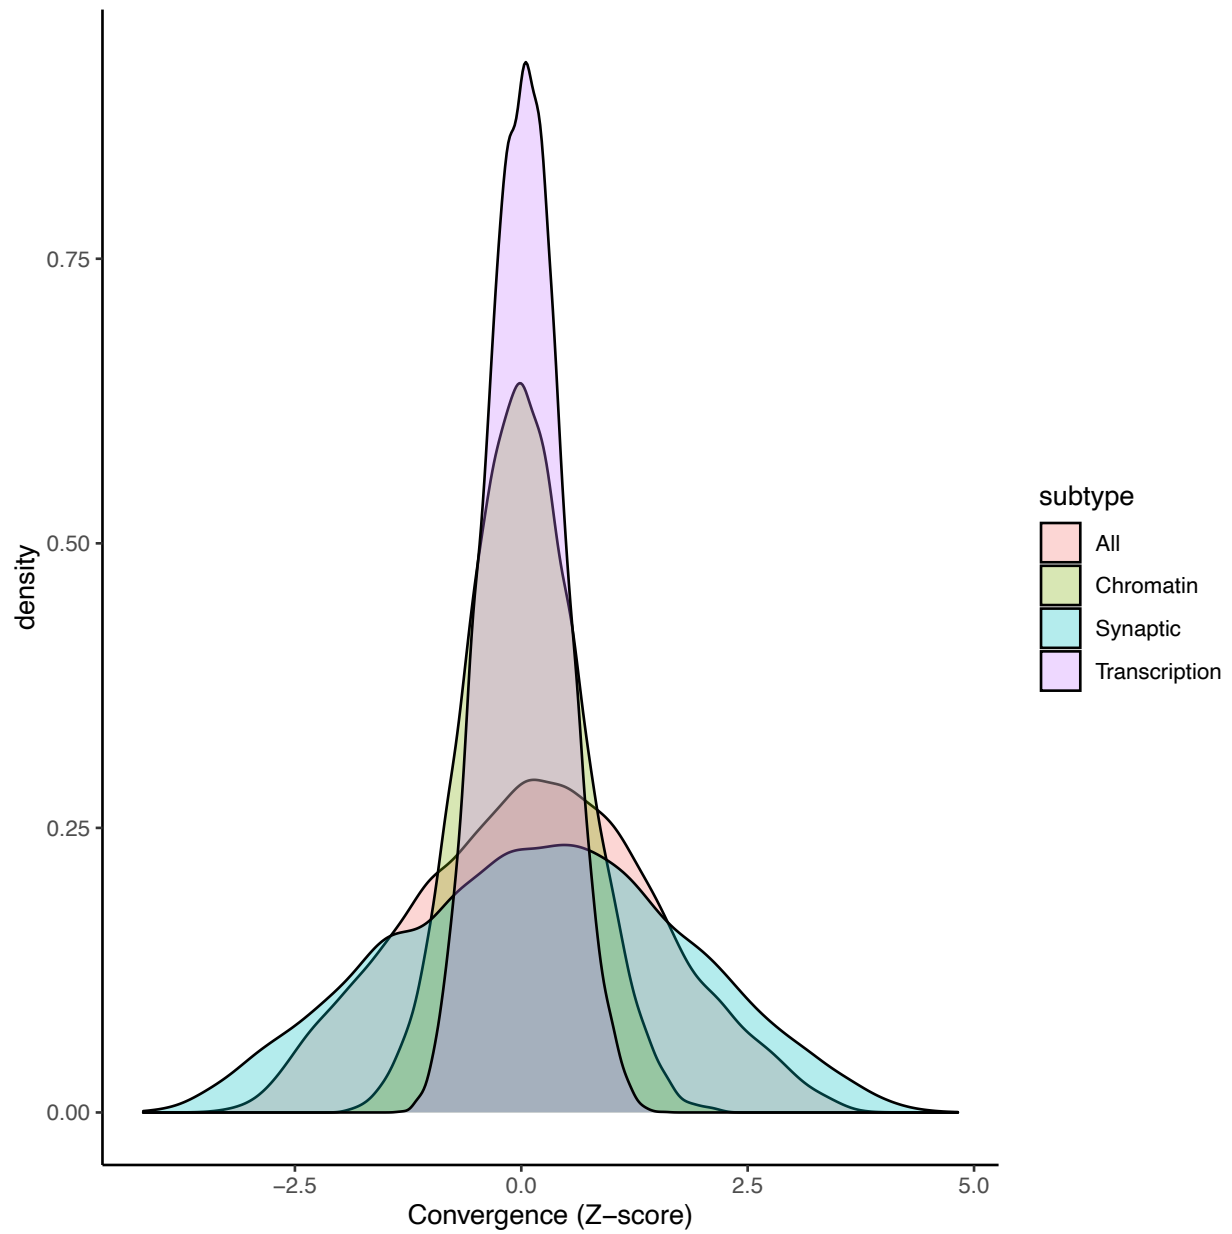

**Supplementary Figure 5. Transcriptional convergence is strongly driven by synaptic genes.**

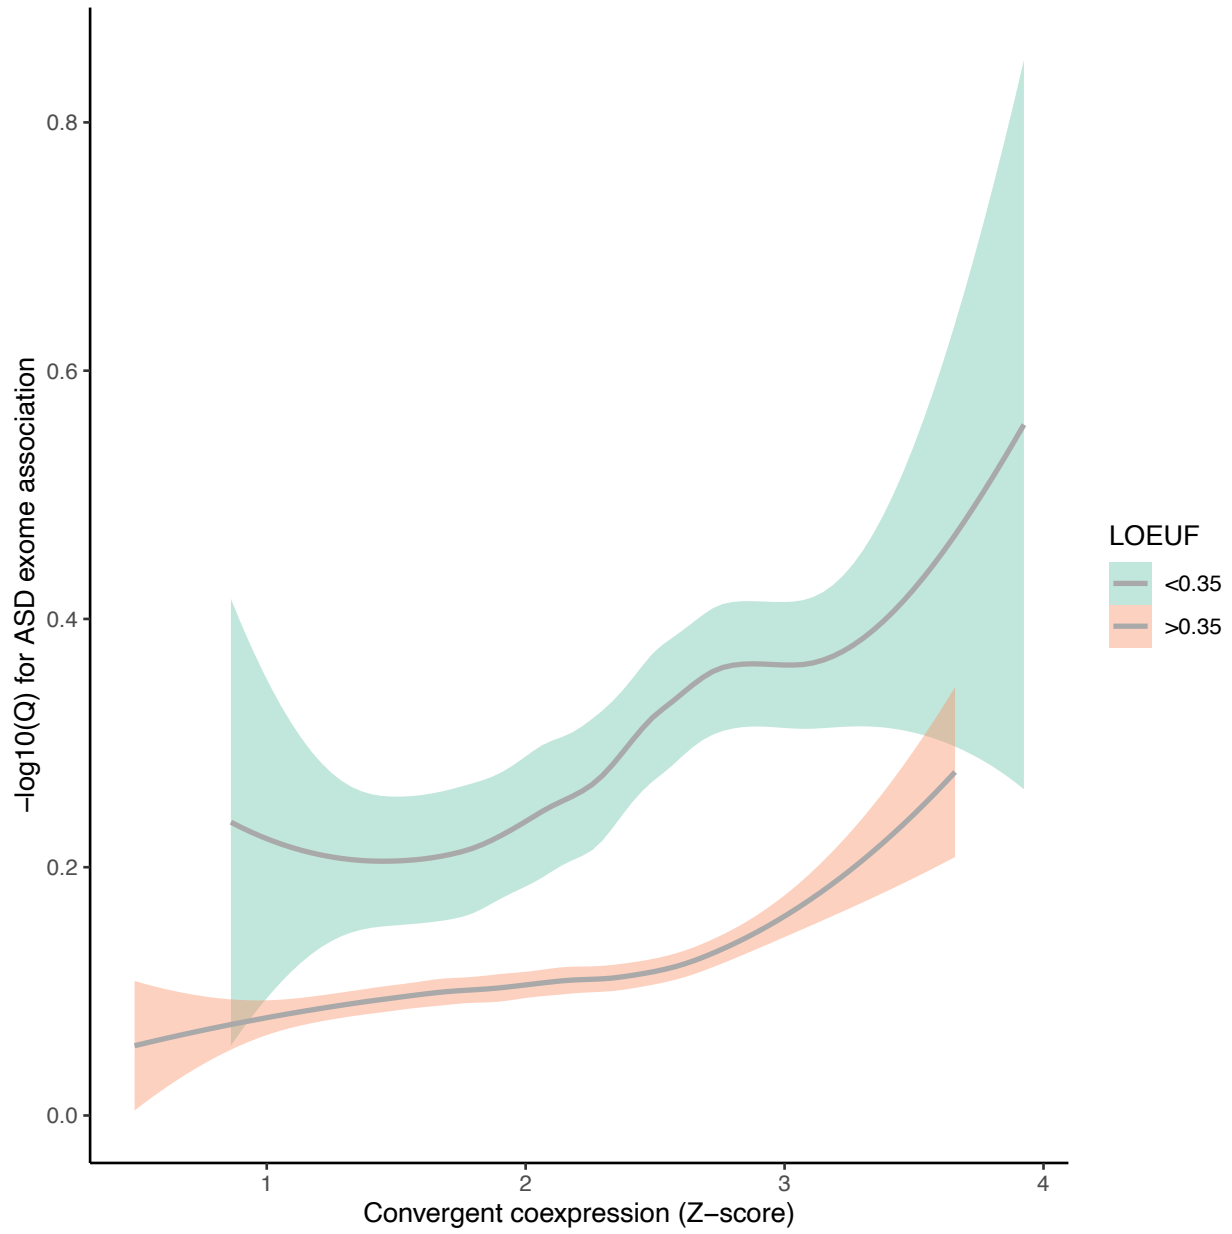

**Supplementary Figure 6. Convergence identifies both tolerant and intolerant genes associated with ASD.**
